# Supplementary material
Source: HighWire-hosted journal article supplement (http://cmajopen.ca/highwire/filestream/81328/field_highwire_adjunct_files/3/2019-0042-reviewer-comments.pdf)
Supplement: 2019-0042-reviewer-comments.pdf [file 2019-0042-reviewer-comments.pdf]

|                                                                                                                                                                                                                                                                                                                                                                                                                                                                                                                                                                                                                                                                                                                                                                                                                                                              |                                                                                                                                                                                                                                                                                                                                                                                                                                                                                                                                                                                                                                                                                                                                     |
|--------------------------------------------------------------------------------------------------------------------------------------------------------------------------------------------------------------------------------------------------------------------------------------------------------------------------------------------------------------------------------------------------------------------------------------------------------------------------------------------------------------------------------------------------------------------------------------------------------------------------------------------------------------------------------------------------------------------------------------------------------------------------------------------------------------------------------------------------------------|-------------------------------------------------------------------------------------------------------------------------------------------------------------------------------------------------------------------------------------------------------------------------------------------------------------------------------------------------------------------------------------------------------------------------------------------------------------------------------------------------------------------------------------------------------------------------------------------------------------------------------------------------------------------------------------------------------------------------------------|
| <b>Article details 2019-0042</b>                                                                                                                                                                                                                                                                                                                                                                                                                                                                                                                                                                                                                                                                                                                                                                                                                             |                                                                                                                                                                                                                                                                                                                                                                                                                                                                                                                                                                                                                                                                                                                                     |
| <b>Title: A regional massive hemorrhage protocol: designed with a modified Delphi technique to obtain consensus</b>                                                                                                                                                                                                                                                                                                                                                                                                                                                                                                                                                                                                                                                                                                                                          |                                                                                                                                                                                                                                                                                                                                                                                                                                                                                                                                                                                                                                                                                                                                     |
| <b>Authors:</b> Jeannie L. Callum MD, Calvin H. Yeh MD PhD, Andrew Petrosoniak MD, Mark J. McVey MD, Stephanie Cope, Troy Thompson BAHSc, Victoria Chin BSc, Keyvan Karkouti MD, Avery B. Nathens MD, Kimmo Murto MD, Suzanne Beno MD, Jacob Pendergrast MD, Andrew McDonald MD, Russell MacDonald MD, Neill K.J. Adhikari MD, Asim Alam MD, Donald Arnold MD, Lee Barratt NP, Andrew Beckett MD, Sue Brenneman, Hina Razzaq Chaudhry MLT, Allison Collins MD, Margaret Harvey, Jacinthe Lampron MD, Clarita Margarido MD, Amanda McFarlan RN, Barto Nascimento MD, Wendy Owens, Menaka Pai MD, Sandro Rizoli MD, Theodora Ruijs MD, Robert Skeate PhD, Teresa Skelton MD, Michelle Sholzberg MD, Kelly Syer RN, Jami-Lynn Viveiros MLT, Josee Theriault MD, Alan Tinmouth MD, Rardi Van Heest MD, Susan White MLT, Michelle Zeller MD, Katerina Pavenski MD |                                                                                                                                                                                                                                                                                                                                                                                                                                                                                                                                                                                                                                                                                                                                     |
| <b>Reviewer 1:</b>                                                                                                                                                                                                                                                                                                                                                                                                                                                                                                                                                                                                                                                                                                                                                                                                                                           | Dr. Ruth Hall                                                                                                                                                                                                                                                                                                                                                                                                                                                                                                                                                                                                                                                                                                                       |
| Institution                                                                                                                                                                                                                                                                                                                                                                                                                                                                                                                                                                                                                                                                                                                                                                                                                                                  | Institute for Clinical Evaluative Sciences, Toronto                                                                                                                                                                                                                                                                                                                                                                                                                                                                                                                                                                                                                                                                                 |
| General comments (author response in bold)                                                                                                                                                                                                                                                                                                                                                                                                                                                                                                                                                                                                                                                                                                                                                                                                                   | <p>A well written paper with a transparent approach that should make a significant contribution to standardizing the management of the exsanguinating patient.</p> <p><b>Thank you, we trust these efforts will be broadly applicable.</b></p> <p>The authors may want to consider commenting on whether or not their results may be transferable to other regions?</p> <p><b>We have expended our comments on adaptability now; our region is geographically and resource diverse and represents many austere as well as high density areas, the results and toolkit will be publically and freely available on the ORBCoN website.</b><br/> <b><a href="http://www.transfusionontario.org">www.transfusionontario.org</a></b></p> |
| <b>Reviewer 2:</b>                                                                                                                                                                                                                                                                                                                                                                                                                                                                                                                                                                                                                                                                                                                                                                                                                                           | Dr. Susan Abou-Raya                                                                                                                                                                                                                                                                                                                                                                                                                                                                                                                                                                                                                                                                                                                 |
| Institution                                                                                                                                                                                                                                                                                                                                                                                                                                                                                                                                                                                                                                                                                                                                                                                                                                                  | Faculty of Medicine, University of Alexandria, Internal Medicine, Alexandria, Egypt                                                                                                                                                                                                                                                                                                                                                                                                                                                                                                                                                                                                                                                 |
| General comments (author response in bold)                                                                                                                                                                                                                                                                                                                                                                                                                                                                                                                                                                                                                                                                                                                                                                                                                   | <p>This is an interesting well-written article on an important clinical issue.</p> <p><b>We have expended our comments on adaptability now; our region is geographically and resource diverse and represents many austere as well as high density areas, the results and toolkit will be publically and freely available on the ORBCoN website.</b><br/> <b><a href="http://www.transfusionontario.org">www.transfusionontario.org</a></b></p>                                                                                                                                                                                                                                                                                      |
